# Supplementary material
Source: MDPI journal article supplement (https://www.mdpi.com/2071-1050/14/16/10430)
Supplement: s1 [file s1 › sustainability-1857866-supplementary.pdf]

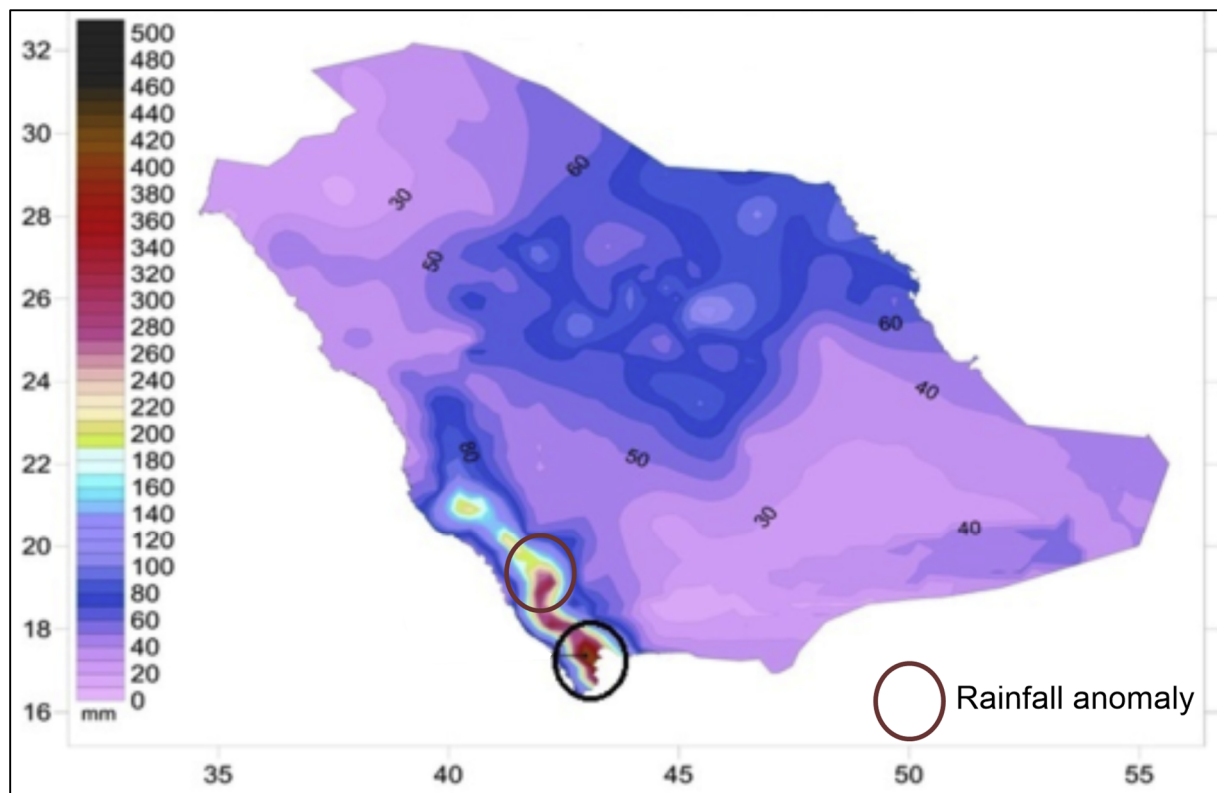

**Figure S1.** Average annual precipitation map of Saudi Arabian (1960 to 2014) (Basahel and Mitri 2017).

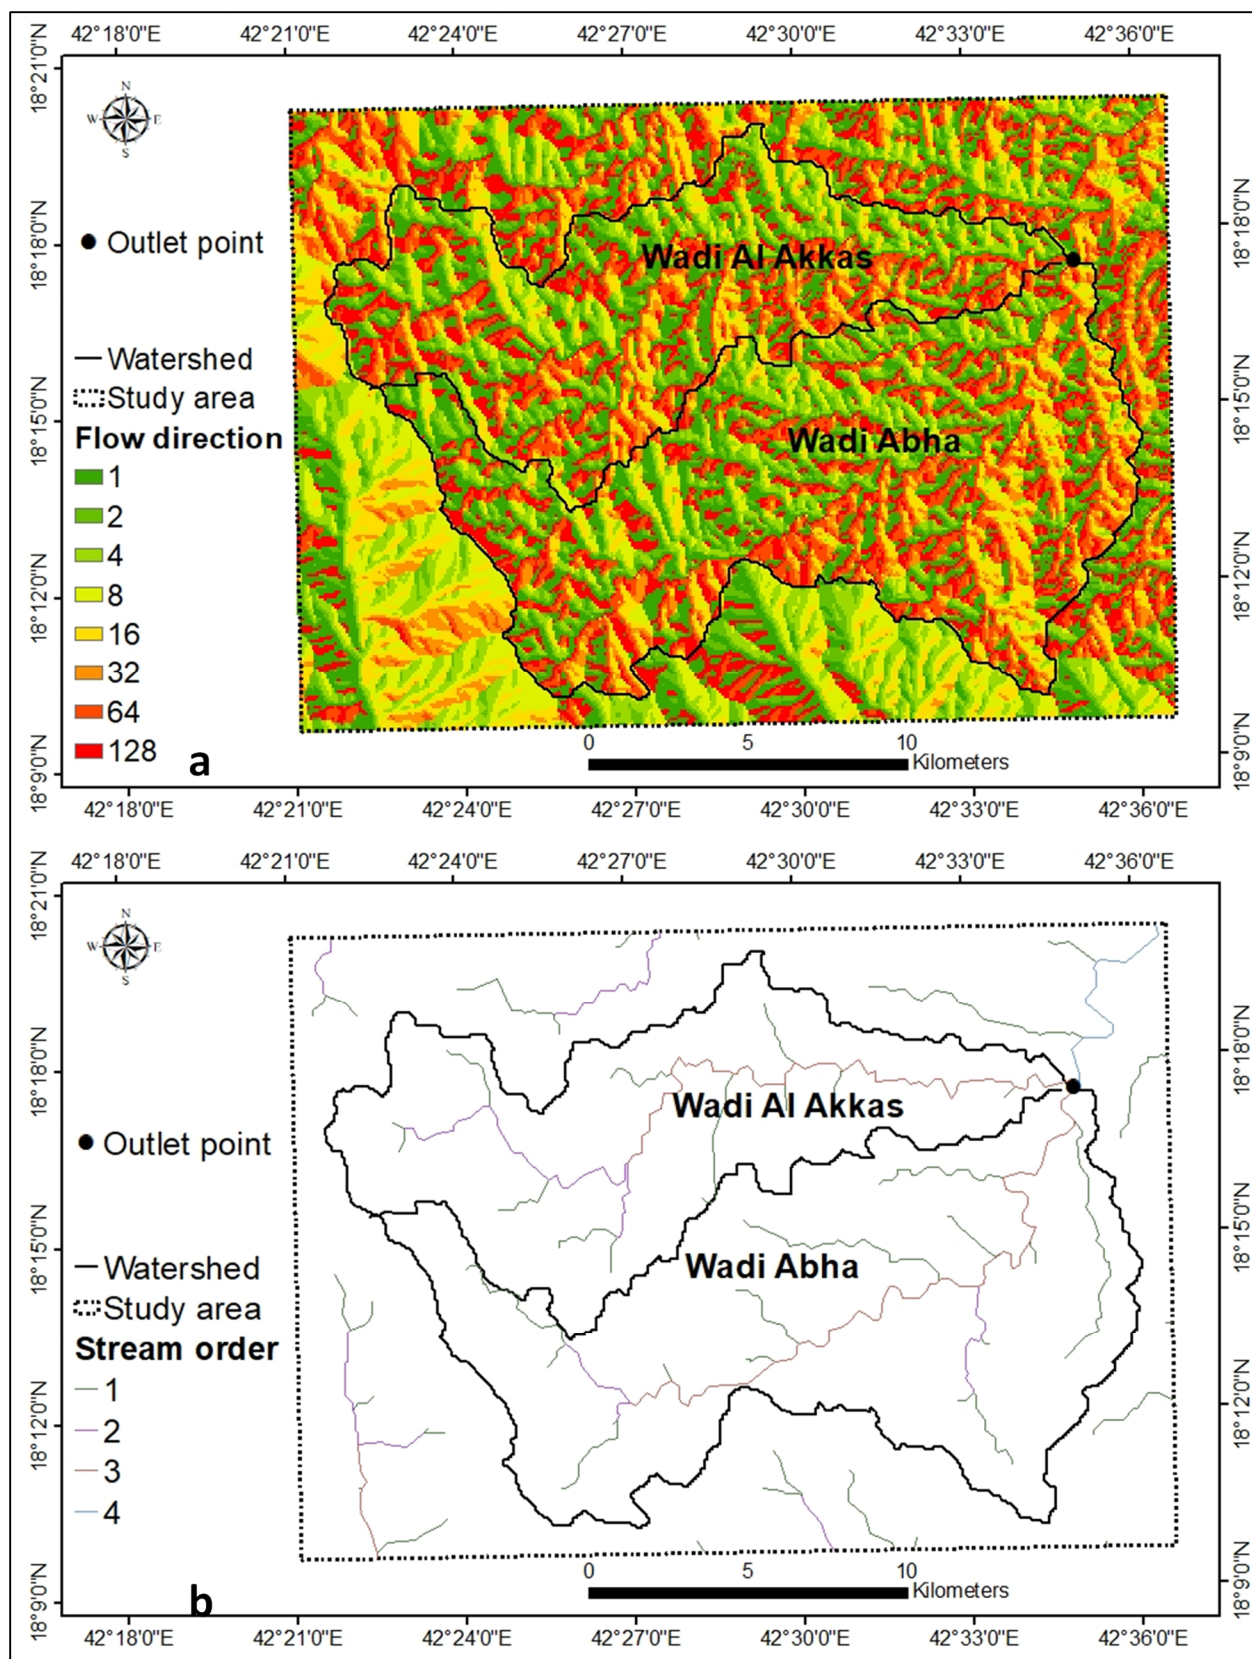

**Figure S2.** (a) Flow direction and (b) stream orders of the watersheds.

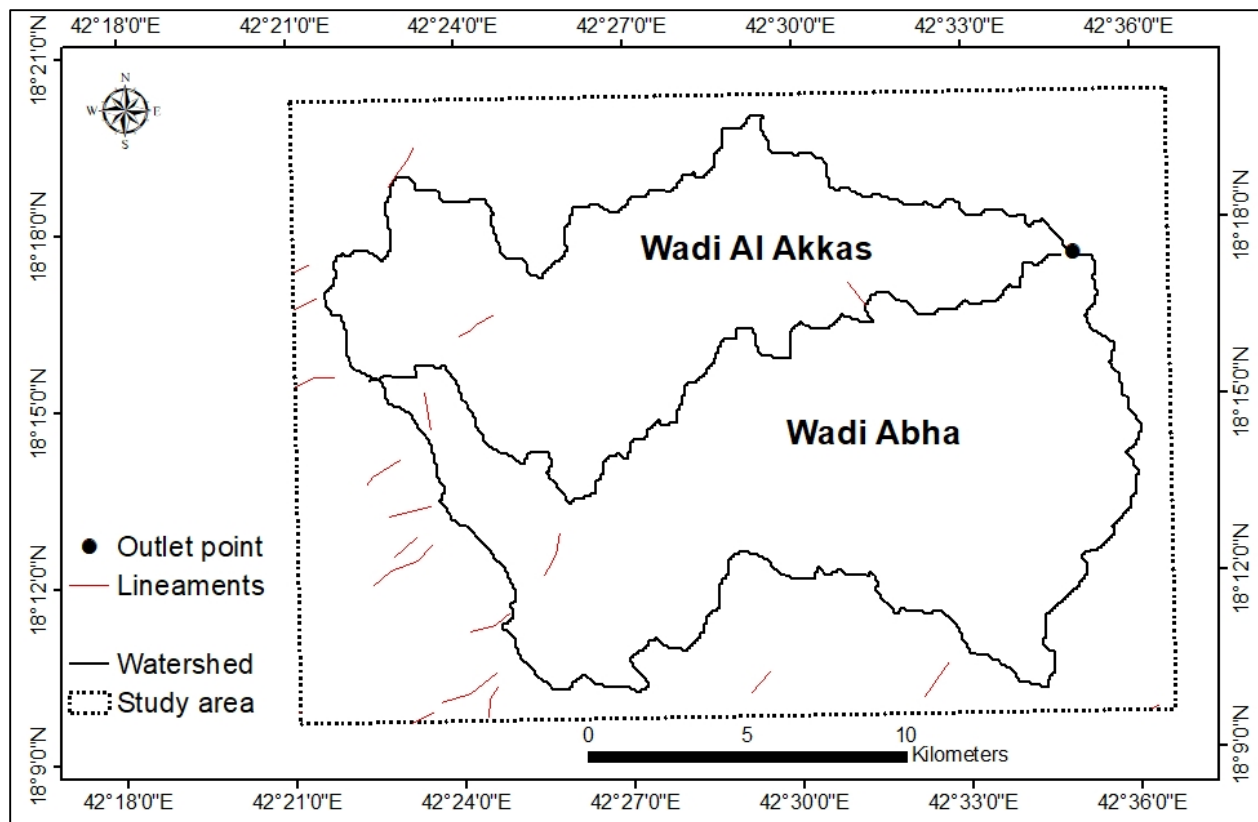

Figure S3. Lineament detection in the watersheds.

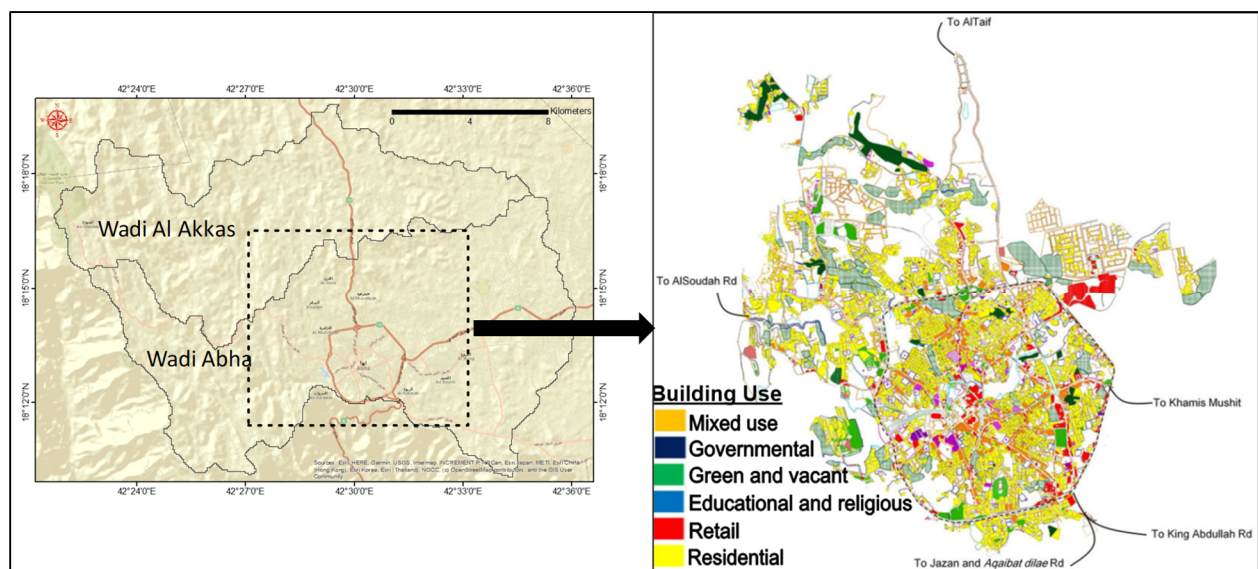

Figure S4. Urbanization distribution in selected study area.

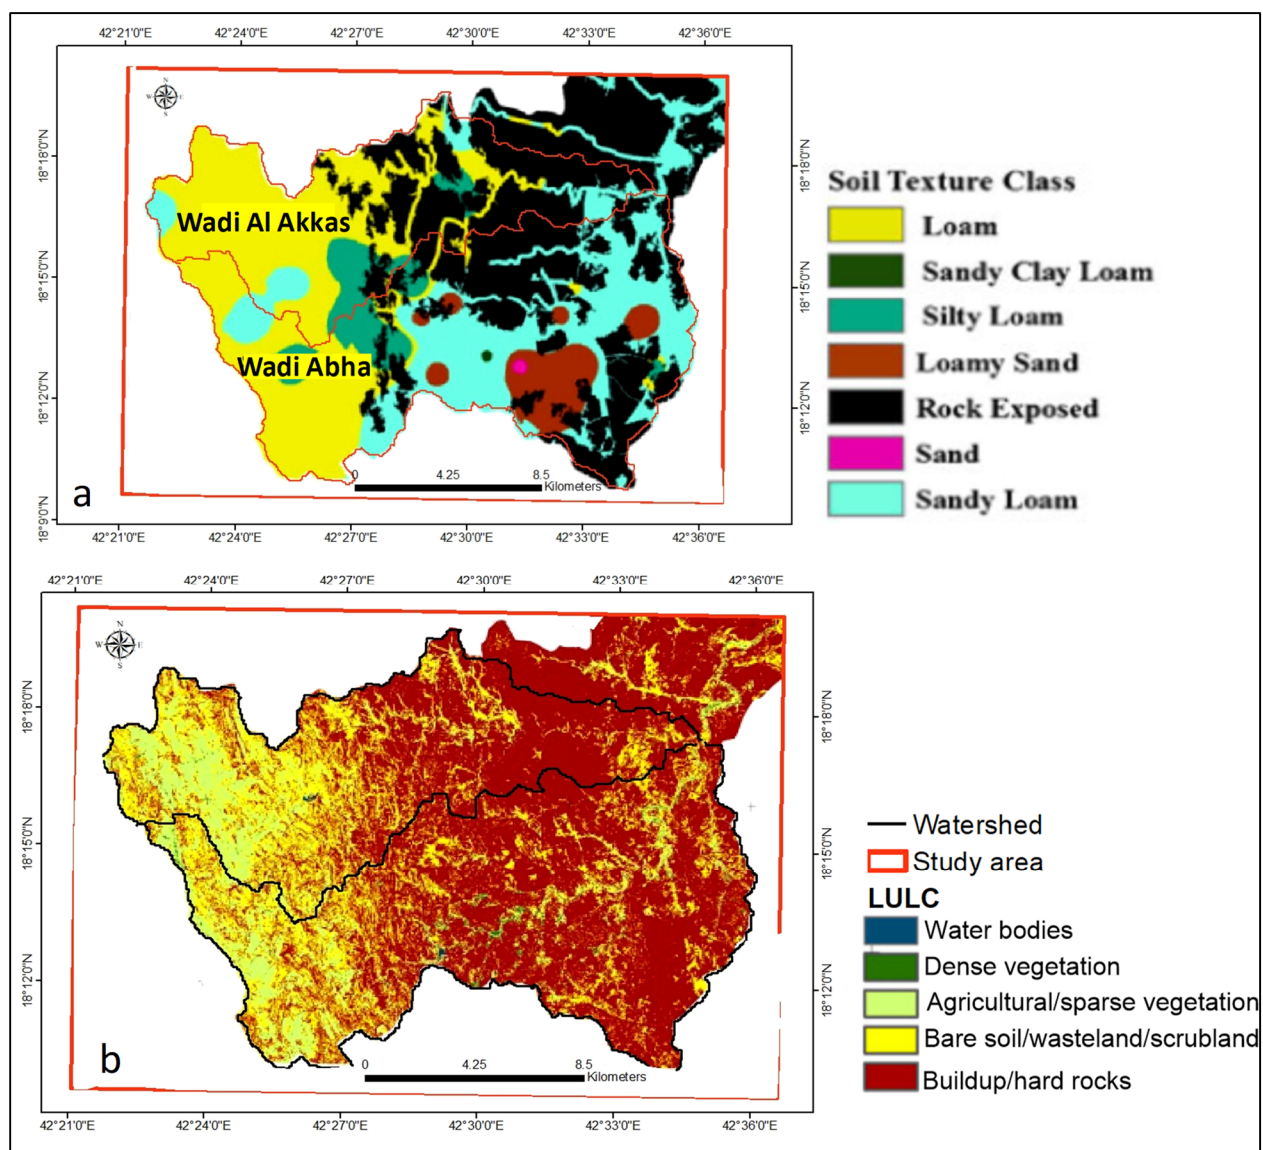

**Figure S5.** (a) Soil textures and (b) Land use land cover of the study area (modified after Mallick 2016).

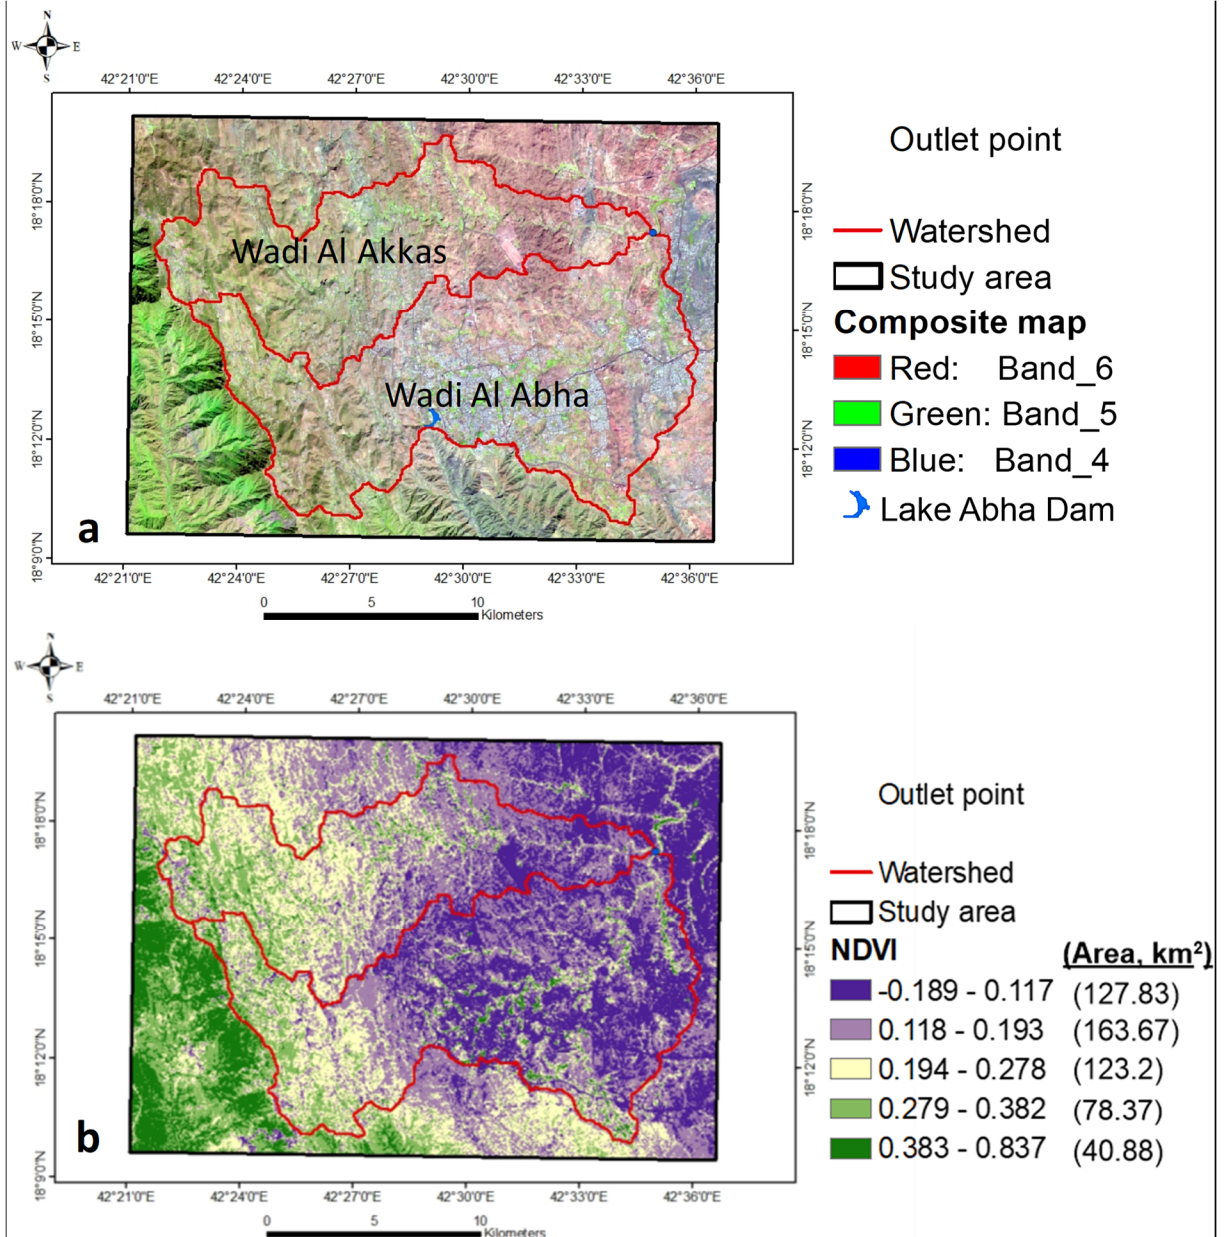

**Figure S6.** (a) Bands 6, 5, and 4 composites, and (b) NDVI distribution.

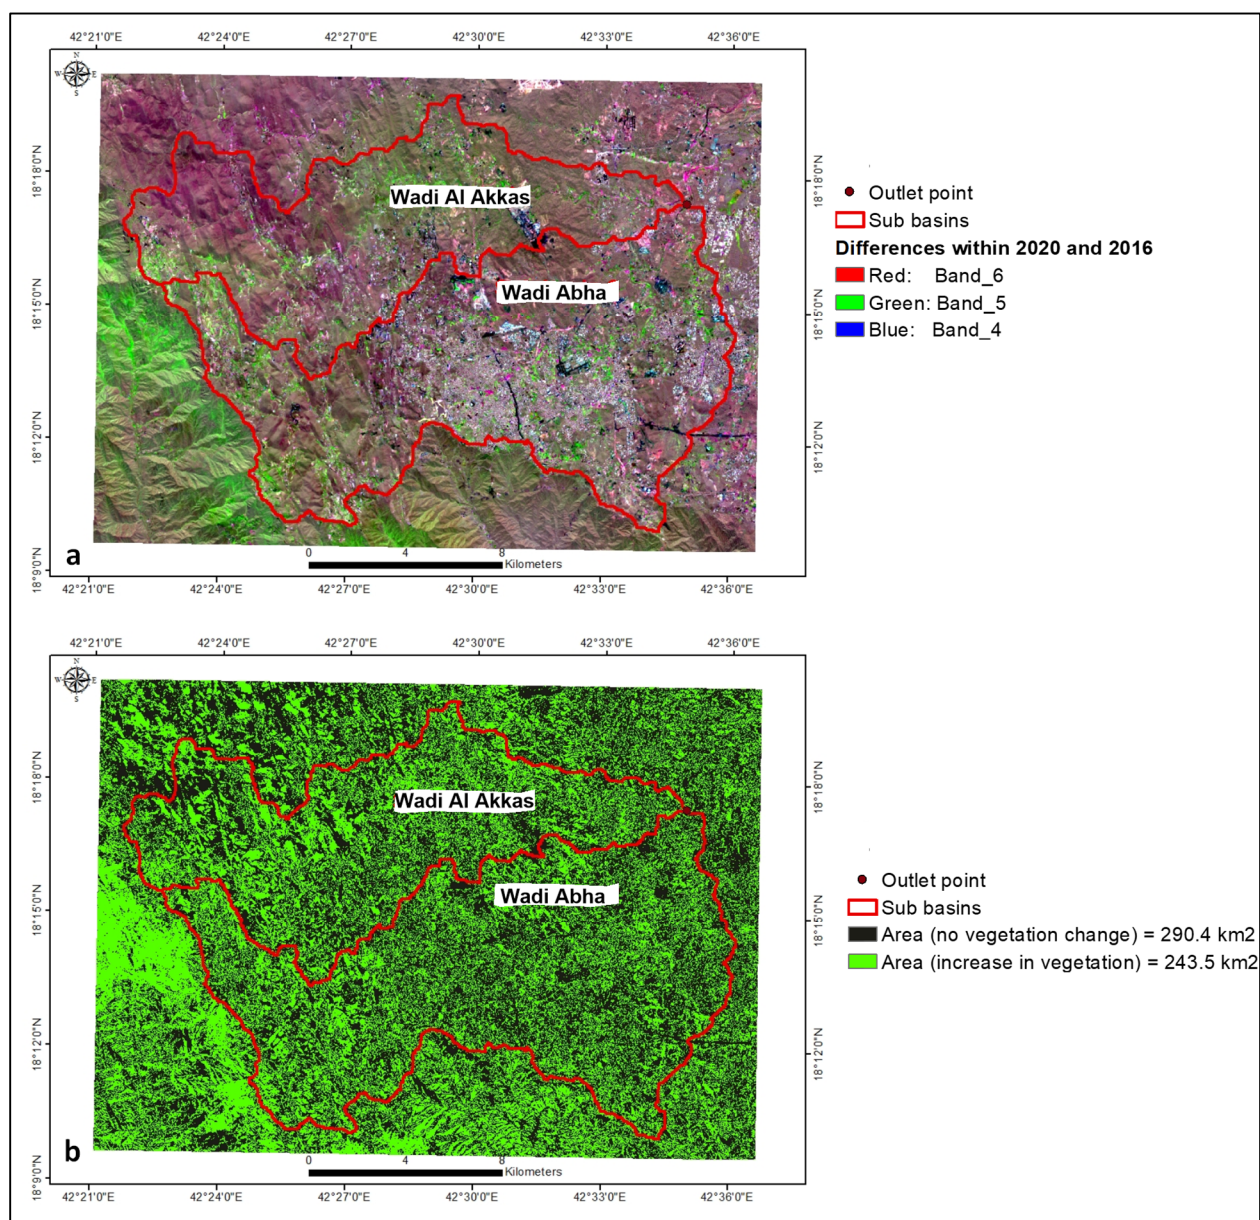



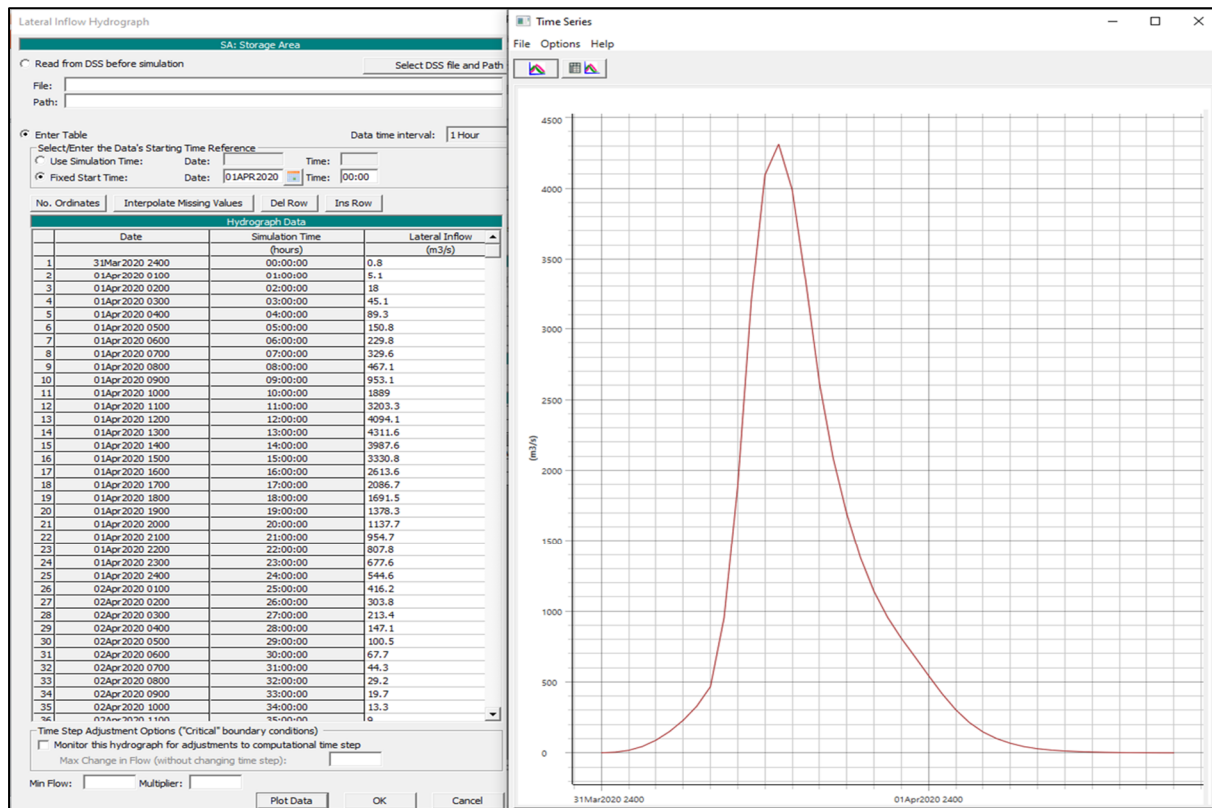

Figure S9. Inflow Hydrograph of watershed area as a storage condition in HEC-RAS.

**Table S1.** Summary results of the Wadi Al Akkas, Wadi Abha, and outlet point (1-5 Apr2020).

|                                                                                 |                                                |                      |
|---------------------------------------------------------------------------------|------------------------------------------------|----------------------|
| Project: Project 2                                                              |                                                | <b>Wadi Al Akkas</b> |
| Simulation Run: Run 1 Subbasin: 1B                                              |                                                |                      |
| Start of Run: 01Apr2020, 15:23                                                  | Basin Model: WMS Watershed                     |                      |
| End of Run: 05Apr2020, 15:28                                                    | Meteorologic Model: WMS Meteorologic Data      |                      |
| Compute Time: 21Sep2021, 11:33:31                                               | Control Specifications: WMS Control Info       |                      |
| Volume Units: <input checked="" type="radio"/> MM <input type="radio"/> 1000 M3 |                                                |                      |
| Computed Results                                                                |                                                |                      |
| Peak Discharge : 1978.6 (M3/S)                                                  | Date/Time of Peak Discharge : 02Apr2020, 07:13 |                      |
| Total Precipitation : 520.00 (MM)                                               | Total Direct Runoff : 445.33 (MM)              |                      |
| Total Loss : 74.67 (MM)                                                         | Total Baseflow : 0.00 (MM)                     |                      |
| Total Excess : 445.33 (MM)                                                      | Discharge : 445.33 (MM)                        |                      |
| Project: Project 2                                                              |                                                | <b>Wadi Abha</b>     |
| Simulation Run: Run 1 Subbasin: 2B                                              |                                                |                      |
| Start of Run: 01Apr2020, 15:23                                                  | Basin Model: WMS Watershed                     |                      |
| End of Run: 05Apr2020, 15:28                                                    | Meteorologic Model: WMS Meteorologic Data      |                      |
| Compute Time: 21Sep2021, 11:33:31                                               | Control Specifications: WMS Control Info       |                      |
| Volume Units: <input checked="" type="radio"/> MM <input type="radio"/> 1000 M3 |                                                |                      |
| Computed Results                                                                |                                                |                      |
| Peak Discharge : 2776.3 (M3/S)                                                  | Date/Time of Peak Discharge : 02Apr2020, 07:33 |                      |
| Total Precipitation : 520.00 (MM)                                               | Total Direct Runoff : 457.45 (MM)              |                      |
| Total Loss : 62.55 (MM)                                                         | Total Baseflow : 0.00 (MM)                     |                      |
| Total Excess : 457.45 (MM)                                                      | Discharge : 457.45 (MM)                        |                      |
| Project: Project 2                                                              |                                                | <b>Outlet point</b>  |
| Simulation Run: Run 1 Junction: 3C                                              |                                                |                      |
| Start of Run: 01Apr2020, 15:23                                                  | Basin Model: WMS Watershed                     |                      |
| End of Run: 05Apr2020, 15:28                                                    | Meteorologic Model: WMS Meteorologic Data      |                      |
| Compute Time: 21Sep2021, 11:33:31                                               | Control Specifications: WMS Control Info       |                      |
| Volume Units: <input checked="" type="radio"/> MM <input type="radio"/> 1000 M3 |                                                |                      |
| Computed Results                                                                |                                                |                      |
| Peak Outflow : 4741.4 (M3/S)                                                    | Date/Time of Peak Outflow : 02Apr2020, 07:23   |                      |
| Total Outflow : 452.56 (MM)                                                     |                                                |                      |
